# Supplementary material
Source: HighWire-hosted journal article supplement (https://bmjopen.bmj.com/content/14/11/e086540)
Supplement: inline-supplementary-material-2 [file inline-supplementary-material-2.pdf]

**Intensive Care Unit Nutrition Guideline**  
Version 1.1, Review due 01/03/2024

  
**North Bristol**  
NHS Trust

# Intensive Care Unit Nutrition Guideline

This guideline is a quick reference guide to feeding patients on ICU at North Bristol NHS Trust.

|             |                       |                       |                                         |
|-------------|-----------------------|-----------------------|-----------------------------------------|
| Version 1.1 | Valid from 01/03/2022 | Review due 01/03/2024 | Authors: Stephen Taylor, Rowan Clemente |
|-------------|-----------------------|-----------------------|-----------------------------------------|

## Introduction

This guideline applies to all patients admitted to Southmead ICU. Follow the enteral feeding process diagram on page 2 for all patients.

## Aims and rationale

### Days 1-2

Support physiological adaptation to critical illness by:

- Correcting micronutrient deficit to optimise metabolic and anti-oxidant systems.
- Provide minimal EN macronutrients to maintain GI function and immunity.

### Days 3-6

Hypocaloric, high nitrogen feeding:

- Energy expenditure: Provide <60% if obese, <80% if other to avoid substrate intolerance
- Nitrogen: 0.2-0.32g/kg/day to optimise wound healing and acute-phase protein response.

### Day 7 onwards

Meet full requirement.

- Energy: Dietitian judges when to meet energy expenditure as substrate tolerance permits.
- Nitrogen and bolus feed/ food: Time to optimise activity-induced anabolism.

## Enteral feeding decision tree

Following admission to ICU, the flow chart on the next page should be followed for all patients (excluding PACE admissions).

**Intensive Care Unit Nutrition Guideline**

Version 1.1, Review due 01/03/2024

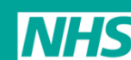
**North Bristol**  
 NHS Trust
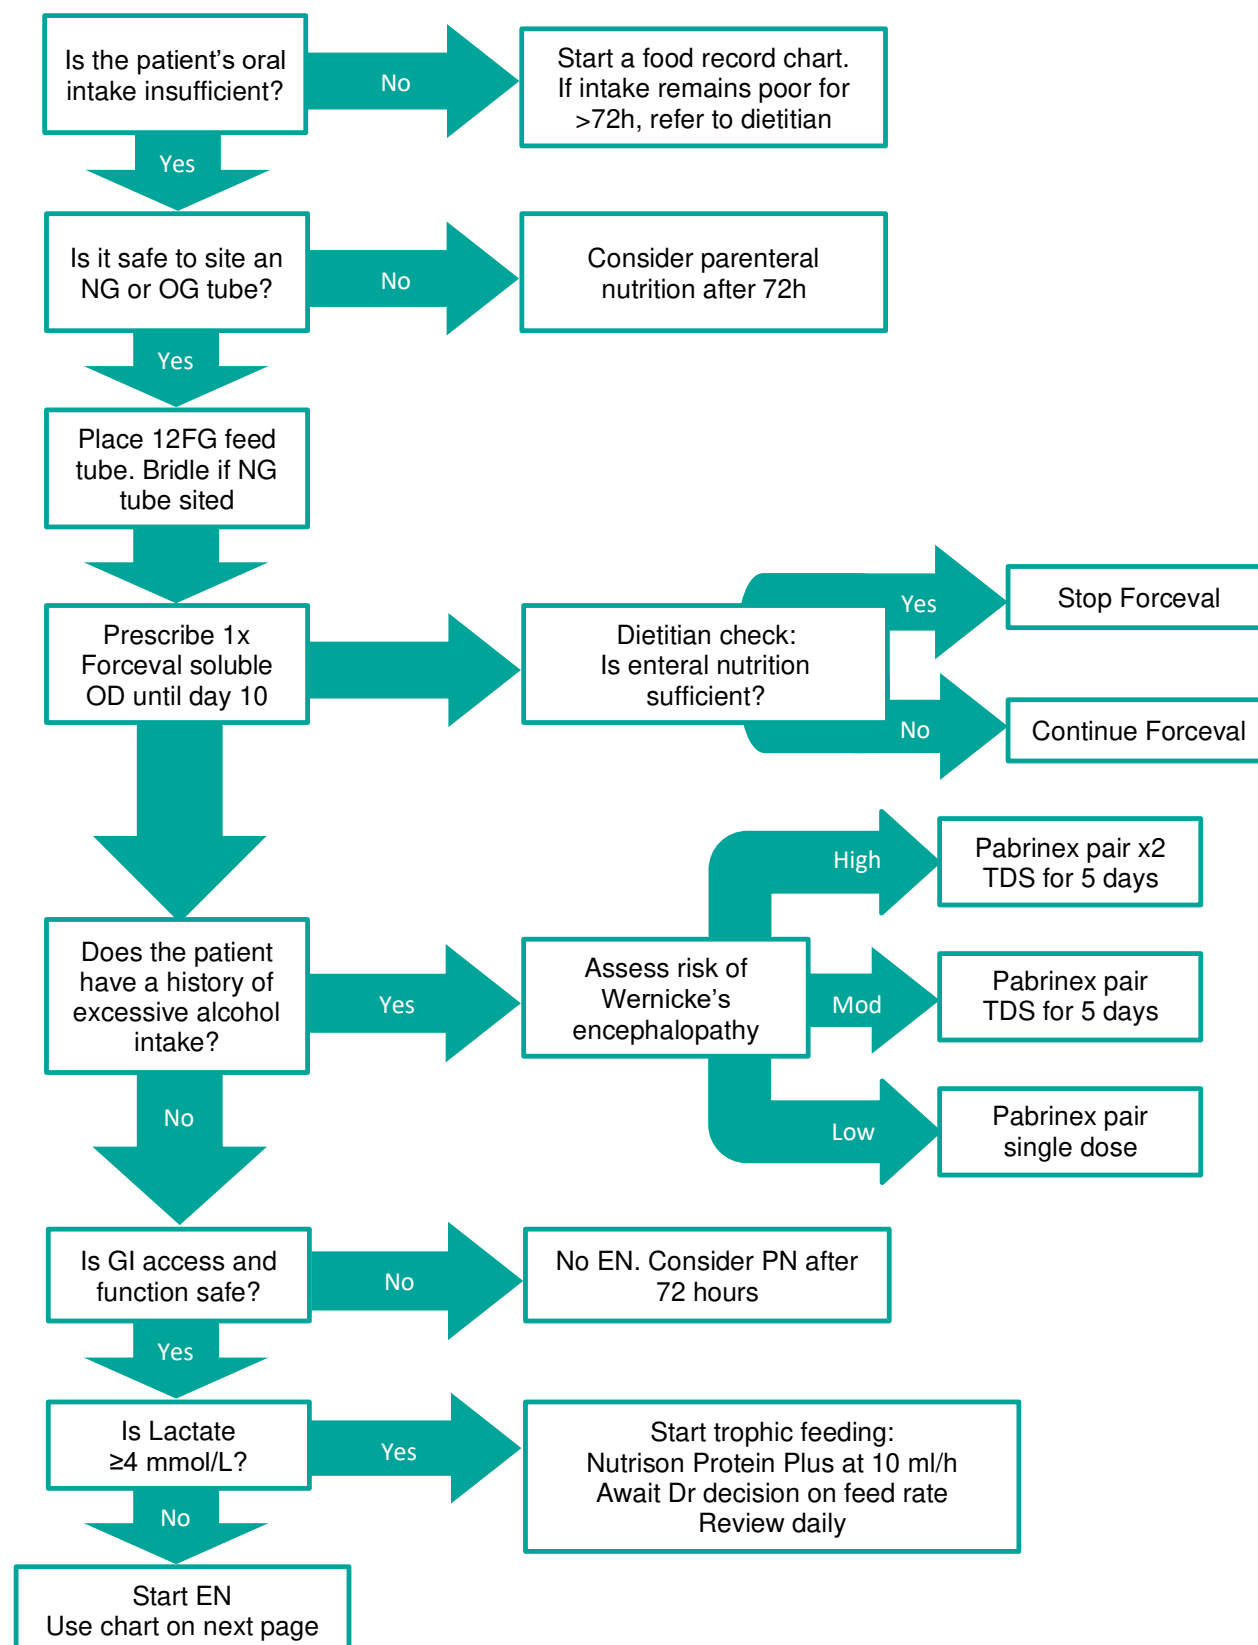

Approved / Owned by ICU SDM

This document can only be guaranteed to be the current adopted version if opened directly from the NBT intranet.

2 of 5

Exceptional healthcare, personally delivered

Nutrition action plan

The following decision tool is designed to summarise responsibilities of nursing and medical staff following admission along with providing an aide-memoire for enteral feeding rates and phosphate replacement.

|               |                                                 | Screen                       | Action                                                            |               |                    |             | Daily WR review        |
|---------------|-------------------------------------------------|------------------------------|-------------------------------------------------------------------|---------------|--------------------|-------------|------------------------|
| ADMISSION     | Nurse                                           | Insufficient food            | Place 12F NGT if necessary and possible                           |               |                    |             | Confirm tube position  |
|               |                                                 | NGT in situ                  | Bridle, ensure clip 0.5cm from septum                             |               |                    |             |                        |
|               | Doctor                                          | All patients                 | Forceval soluble                      1 tablet OD NG until day 10 |               |                    |             | Dietitian may cancel   |
|               |                                                 | Wernicke's risk              | Pabrinex 1 pair                                                   | High<br>2 TDS | Possible<br>1 TDS  | Low<br>1 OD | Symptom > dose review  |
|               |                                                 |                              | Duration                                                          | 5 days        | 5 days             | One off     |                        |
|               |                                                 | Burn, CRRT                   | 1 pair Pabrinex IV OD & 10mL Additracce IV OD                     |               |                    |             | Dietitian will review  |
|               |                                                 | No GI access / poor function | No enteral nutrition                                              |               |                    |             | Consider TPN after 72h |
| Lactate > 4.0 | 10ml/h Nutrison Protein Plus until WR decision. |                              |                                                                   |               | Feed rate decision |             |                        |

|              |                                           |                                                    |                                                             |                                            |                                       |                                        |                                                         |    |
|--------------|-------------------------------------------|----------------------------------------------------|-------------------------------------------------------------|--------------------------------------------|---------------------------------------|----------------------------------------|---------------------------------------------------------|----|
| DAILY        | Nurse                                     | Start NG feed (ml/hr)                              |                                                             | Most patients                              | Fluid restricted or K+ >5.0 & no CRRT | Check gastric residual volume 4 hourly |                                                         |    |
|              |                                           |                                                    | Nutrison                                                    | Protein Plus                               | Concentrated                          |                                        |                                                         |    |
|              |                                           |                                                    | Day 1 & 2                                                   | 30                                         | 20                                    |                                        | < 250mL bile/feed:                                      |    |
|              |                                           |                                                    | Then: full feed                                             | Dietitian regime or use actual weight (kg) |                                       |                                        | → Return + full feed rate                               |    |
|              |                                           |                                                    | 40kg                                                        | 40                                         | 27                                    |                                        | ⬇️                                                      |    |
|              |                                           |                                                    | 50kg                                                        | 45                                         | 30                                    |                                        | ≥ 250mL or blood / faecal / vomit                       |    |
|              |                                           |                                                    | 60kg                                                        | 50                                         | 32                                    |                                        | → Discard + full feed rate                              |    |
|              |                                           |                                                    | 70kg +                                                      | 55                                         | 35                                    |                                        | ⬇️                                                      |    |
|              | Doctor                                    | Phosphate                                          | IV polyfusor                                                | ml                                         | ml/hr                                 | Hours                                  | If 2nd > 250mL or vomit<br>→ Metoclopramide 10mg IV TDS |    |
|              |                                           | < 0.5 *                                            |                                                             | 400                                        | 33                                    | 12                                     | ⬇️                                                      |    |
|              |                                           | < 0.65 *                                           |                                                             | 300                                        | 25                                    | 12                                     | 24h: unresolved or ≤ full rate EN?                      |    |
|              |                                           |                                                    | * If <72h of feed > ⬇️ feed to 30ml/h until phosphate > 1.0 |                                            |                                       |                                        |                                                         | ⬇️ |
|              |                                           | <0.8                                               |                                                             | 200                                        | 17                                    | 12                                     | Request NJ via dieticians                               |    |
|              |                                           | 0.8-1.0 or if previous day <0.8                    | Phosphate sandoz                                            | 1 tablet TDS                               |                                       |                                        | If > 24h delay for NJ:<br>Erythromycin 250mg IV QDS     |    |
| CRRT         |                                           | Adjust daily supplement to maintain PO4 at 1.0-1.4 |                                                             |                                            |                                       |                                        | Version 2.0, December 19                                |    |
| New infusion | Recheck phosphate level before commencing |                                                    |                                                             |                                            |                                       |                                        |                                                         |    |

Management of gastric aspirates

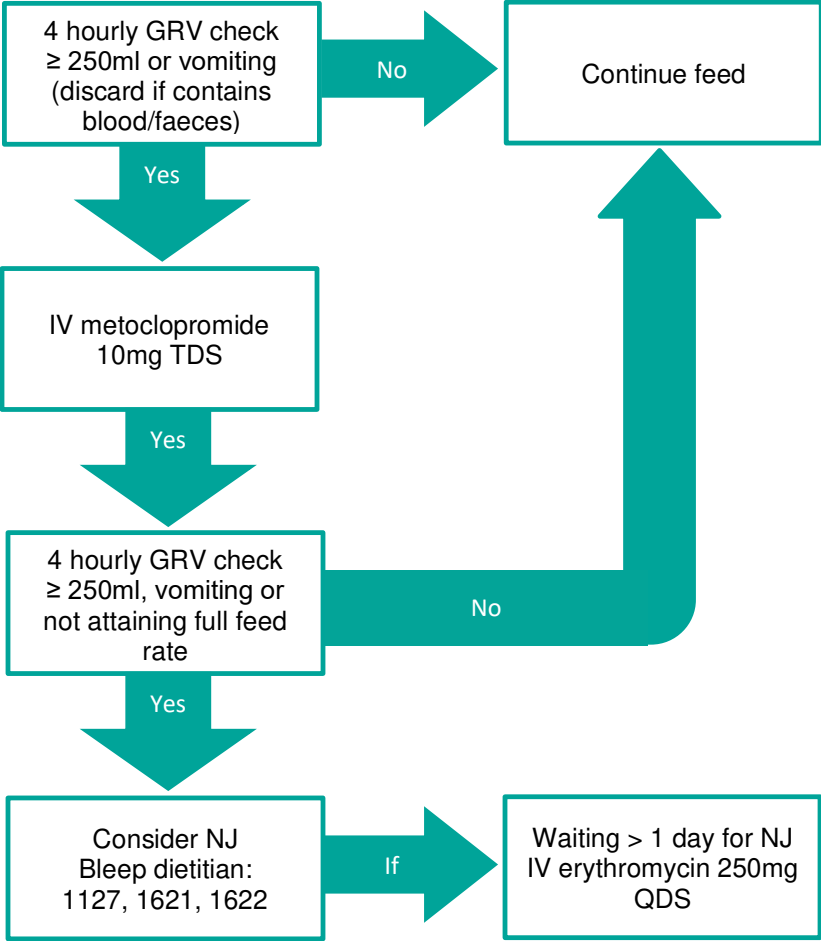

Total Parenteral Nutrition (TPN)

In hours

If the multidisciplinary team have made the clinical decision that TPN is required, bleep your Pod dietitian.

Out of hours

If the multidisciplinary team have made the clinical decision that TPN is required over the weekend:

- Complete the TPN calculator (intranet) to determine safest infusion rate

| Responsibility | Name           | Division / Specialty | Job Title |
|----------------|----------------|----------------------|-----------|
| Authorised by  | ICU SDM        | Intensive Care Unit  | -         |
| Author         | Stephen Taylor | Intensive Care Unit  | Dietitian |
| Author         | Rowan Clemente | Intensive Care Unit  | Dietitian |

Approved / Owned by ICU SDM

This document can only be guaranteed to be the current adopted version if opened directly from the NBT intranet.

Intensive Care Unit Nutrition Guideline

Version 1.1, Review due 01/03/2024



North Bristol  
NHS Trust
